# Supplementary material for: Stability Analysis and Identification of Superior Hybrids in Pearl Millet [Pennisetum glaucum (L.) R. Br.] Using the Multi Trait Stability Index
Source: MDPI journal article supplement (doi:10.3390/plants13081101), 2024-04-15
Supplement: s1 [file s1]

Table S1: List of hybrids used in the study with its description

| S.No. | Test Code | Project Code         | Identity      | Pedigree              | Institution                        |
|-------|-----------|----------------------|---------------|-----------------------|------------------------------------|
| 1     | SHT 101   | MSH 361              | SVPMH-101     | SVMSA-112 x SVR-50    | Shakti Vardhak Hyb. Seed Pvt. Ltd. |
| 2     | SHT 102   | MSH 363              | BLPMH 109     | BLPMA002 x BLPMR1414  | Bisco BioSciences Pvt. Ltd.        |
| 3     | SHT 103   | MSH 371              | PB1879        | PSP128 x PP108        | Bayer Biosciences Pvt. Ltd.        |
| 4     | SHT 104   | MSH 372              | PB1966        | PSP83 x PP130         | Bayer Biosciences Pvt. Ltd.        |
| 5     | SHT 105   | MSH 377              | 86M22         | M461F x M458R         | Corteva Agriscince, Hyderabad      |
| 6     | SHT 106   | MP 7366 (Check)      | -             | -                     | Metahelix Life Science Ltd.        |
| 7     | SHT 107   | MSH 378              | PB2119607     | M453F x M458R         | Corteva Agriscince, Hyderabad      |
| 8     | SHT 108   | MSH 379              | PB2110622     | M508F x 9PEZA76R      | Corteva Agriscince, Hyderabad      |
| 9     | SHT 109   | MSH 380              | PB211A114     | M453F x 9PNQR68R      | Corteva Agriscince, Hyderabad      |
| 10    | SHT 110   | MSH 381              | PB211A128     | M500F x 9PEZA76R      | Corteva Agriscince, Hyderabad      |
| 11    | SHT 111   | Nandi 75 (Check)     | -             | -                     | Nandi Seeds Pvt. Ltd.              |
| 12    | SHT 112   | MSH 382              | GHB 1288      | ICMA1 15777 x J-2635  | ICAR-AICRP-PM, JAU, Jamnagar       |
| 13    | SHT 113   | MSH 383              | GHB 1322      | ICMA1 14333 x J-2637  | ICAR-AICRP-PM, JAU, Jamnagar       |
| 14    | SHT 114   | MSH 384              | GHB 1333      | JMSA1 20191 x J-2636  | ICAR-AICRP-PM, JAU, Jamnagar       |
| 15    | SHT 115   | 86M64 (Check)        | -             | -                     | Pioneer Overseas Corp.             |
| 16    | SHT 116   | MSH 385              | KPH6310       | KP19SA018 x KP19SR020 | Kaveri Seeds Co. Ltd.              |
| 17    | SHT 117   | MSH 386              | VNR 3535      | VNRF-14 x VNRBB-1166  | VNR Seeds Pvt. Ltd.                |
| 18    | SHT 118   | MSH 387              | Mahabeej-1005 | MBJ-2A x MBJ-1R       | MSSCL, Akola                       |
| 19    | SHT 119   | Proagro 9444 (Check) | -             | -                     | Bayer Biosciences Pvt. Ltd.        |
| 20    | SHT 120   | MSH 388              | HYMH 4069     | HYMA 557 x HYMR 6444  | Hi-Yield Agri-Genetics Pvt. Ltd.   |
| 21    | SHT 121   | MSH 389              | PB1918        | PSP99 x PP119         | Bayer Biosciences Pvt. Ltd.        |

Table S2: Experimental details

| Code | Name of location    | Sowing date | Spacing                                                  | Plot size (m <sup>2</sup> ) |
|------|---------------------|-------------|----------------------------------------------------------|-----------------------------|
|      |                     |             | No. of rows $\times$ spacing (m) $\times$ row length (m) |                             |
| E1   | Mandor              | 18/02/21    | $6 \times 0.60 \times 4.0$                               | 14.40                       |
| E2   | Jamnagar            | 16/02/21    | $6 \times 0.60 \times 4.0$                               | 14.40                       |
| E3   | S K Nagar           | 25/02/21    | $6 \times 0.45 \times 4.0$                               | 10.80                       |
| E4   | Ahmedabad           | 02/03/21    | $6 \times 0.50 \times 4.0$                               | 12.00                       |
| E5   | NARP,<br>Aurangabad | 17/02/21    | $6 \times 0.50 \times 4.0$                               | 12.00                       |
| E6   | Coimbatore          | 26/02/21    | $6 \times 0.50 \times 4.0$                               | 12.00                       |

Table S3: Mean and range of quantitative traits of pearl millet hybrid at six environments in summer-2021

| Traits | E1: Mandor |        |        | E2: Jamnagar |        |        | E3: S. K. Nagar |        |        | E4: Ahmedabad |        |        | E5: NARP Aurangabad |        |        | E6: Coimbatore |        |        |
|--------|------------|--------|--------|--------------|--------|--------|-----------------|--------|--------|---------------|--------|--------|---------------------|--------|--------|----------------|--------|--------|
|        | Min        | Max    | Mean   | Min          | Max    | Mean   | Min             | Max    | Mean   | Min           | Max    | Mean   | Min                 | Max    | Mean   | Min            | Max    | Mean   |
| DF     | 44.00      | 67.00  | 59.76  | 44.00        | 53.00  | 49.00  | 49.00           | 68.00  | 57.08  | 45.00         | 61.00  | 53.25  | 57.00               | 69.00  | 62.60  | 42.00          | 59.00  | 51.25  |
| DM     | 79.00      | 99.00  | 89.91  | 74.00        | 84.00  | 79.16  | 80.00           | 90.00  | 83.91  | 74.00         | 89.00  | 81.71  | 92.00               | 102.00 | 97.27  | 83.00          | 99.00  | 92.59  |
| PH     | 153.00     | 203.00 | 181.84 | 172.00       | 247.00 | 199.00 | 181.00          | 255.00 | 215.00 | 160.00        | 225.00 | 199.91 | 115.00              | 182.00 | 156.43 | 168.00         | 229.00 | 206.08 |
| PTPP   | 1.40       | 4.60   | 2.84   | 2.00         | 4.20   | 2.76   | 1.40            | 2.00   | 1.72   | 1.00          | 2.00   | 1.16   | 1.00                | 4.00   | 2.03   | 2.20           | 3.20   | 2.53   |
| PL     | 18.00      | 31.00  | 25.44  | 25.00        | 34.00  | 28.71  | 23.00           | 31.00  | 26.89  | 21.00         | 35.00  | 26.86  | 23.00               | 32.00  | 26.05  | 23.00          | 33.00  | 27.81  |
| PD     | 2.50       | 3.60   | 3.11   | 2.60         | 3.90   | 3.26   | 2.80            | 3.90   | 3.32   | 2.40          | 3.70   | 3.07   | 3.10                | 3.90   | 3.31   | 2.80           | 4.20   | 3.55   |
| TSW    | 7.70       | 11.60  | 9.22   | 8.80         | 12.50  | 10.08  | 8.50            | 12.80  | 10.28  | 4.00          | 6.80   | 5.32   | 9.80                | 13.70  | 11.84  | 9.20           | 13.80  | 11.50  |
| PP     | 145.00     | 227.00 | 194.14 | 163.00       | 236.00 | 218.21 | 171.00          | 269.00 | 220.67 | 165.00        | 229.00 | 205.06 | 145.00              | 156.00 | 152.35 | 90.00          | 124.00 | 109.16 |
| SS%    | 10.00      | 97.00  | 75.76  | 40.00        | 95.00  | 70.11  | 11.00           | 81.00  | 54.87  | 44.00         | 89.00  | 73.76  | 95.00               | 100.00 | 98.73  | 24.00          | 94.00  | 79.16  |
| GY     | 3.28       | 7.33   | 5.24   | 4.81         | 9.13   | 7.11   | 3.80            | 8.40   | 6.70   | 4.47          | 7.35   | 6.21   | 1.90                | 5.40   | 3.91   | 2.96           | 7.14   | 4.68   |
| DFY    | 12.30      | 26.00  | 19.46  | 8.40         | 15.80  | 11.77  | 7.00            | 12.00  | 9.60   | 13.45         | 24.39  | 19.37  | 7.00                | 11.50  | 9.70   | 6.33           | 13.01  | 9.52   |
| Fe     | 20.00      | 53.00  | 36.14  | 39.00        | 82.00  | 51.81  | 45.00           | 101.00 | 68.79  | 26.00         | 67.00  | 40.29  | 51.00               | 98.00  | 74.16  | 36.00          | 76.00  | 51.73  |
| Zn     | 24.00      | 49.00  | 34.19  | 31.00        | 48.00  | 39.41  | 16.00           | 33.00  | 22.43  | 3.00          | 23.00  | 10.70  | 33.00               | 60.00  | 42.57  | 22.00          | 58.00  | 42.43  |

DF: days to 50% flowering, DM: days to maturity, PH: plant height, PTPP: number of productive tillers per plant, PL: panicle length, PD, panicle diameter, TSW: 1000 seed weight, PP: plant population at harvest, SS%: seed set under bagging condition, GY: grain yield, DFY: dry fodder yield, Fe: grain iron content, Zn: grain zinc content

Table S4: location wise mean performance of all 21 pearl millet hybrids in summer-2021

| E1: Mandor   |       |       |        |      |       |      |       |        |       |      |       |       |       |
|--------------|-------|-------|--------|------|-------|------|-------|--------|-------|------|-------|-------|-------|
| Hybrid       | DF    | DM    | PH     | PTPP | PL    | PD   | TSW   | PP     | SS    | GY   | DFY   | Fe    | Zn    |
| SHT 101      | 59.33 | 90.33 | 193.00 | 2.47 | 26.67 | 3.03 | 9.17  | 209.00 | 55.00 | 5.06 | 22.57 | 39.67 | 35.33 |
| SHT 102      | 61.67 | 91.33 | 170.00 | 2.47 | 29.33 | 3.13 | 10.03 | 191.67 | 49.00 | 5.73 | 17.24 | 22.67 | 27.00 |
| SHT 103      | 59.33 | 89.00 | 182.33 | 3.07 | 24.67 | 2.87 | 10.57 | 197.00 | 30.33 | 4.94 | 23.03 | 35.33 | 31.33 |
| SHT 104      | 58.00 | 88.00 | 189.67 | 3.13 | 25.00 | 2.93 | 9.60  | 203.00 | 93.67 | 5.19 | 22.33 | 32.00 | 33.33 |
| SHT 105      | 58.33 | 88.67 | 178.00 | 2.20 | 25.67 | 3.13 | 10.03 | 193.33 | 88.00 | 5.58 | 21.40 | 36.67 | 41.00 |
| SHT 106      | 62.00 | 91.67 | 178.67 | 2.67 | 26.00 | 3.17 | 9.77  | 205.67 | 63.33 | 5.10 | 19.32 | 41.00 | 38.00 |
| SHT 107      | 58.33 | 88.67 | 192.00 | 2.87 | 24.67 | 3.20 | 9.10  | 192.33 | 87.67 | 5.62 | 19.15 | 34.33 | 32.33 |
| SHT 108      | 58.67 | 89.33 | 186.33 | 3.13 | 27.67 | 3.37 | 8.33  | 201.00 | 91.67 | 6.65 | 19.59 | 35.67 | 35.00 |
| SHT 109      | 63.00 | 92.33 | 191.67 | 3.27 | 25.00 | 3.23 | 8.53  | 199.00 | 83.33 | 5.74 | 23.90 | 37.67 | 30.67 |
| SHT 110      | 59.00 | 89.00 | 190.00 | 3.07 | 27.00 | 3.23 | 9.03  | 197.67 | 85.33 | 5.99 | 21.48 | 37.00 | 31.33 |
| SHT 111      | 59.67 | 90.33 | 186.33 | 3.40 | 25.00 | 3.13 | 9.37  | 197.67 | 78.00 | 5.04 | 20.10 | 37.67 | 33.33 |
| SHT 112      | 59.00 | 89.00 | 158.00 | 3.13 | 26.33 | 3.13 | 8.60  | 188.67 | 84.00 | 4.77 | 16.10 | 37.00 | 33.33 |
| SHT 113      | 61.00 | 90.00 | 187.00 | 2.53 | 28.00 | 3.17 | 9.73  | 198.67 | 83.67 | 4.78 | 18.84 | 38.33 | 37.67 |
| SHT 114      | 59.67 | 89.33 | 171.67 | 2.87 | 24.67 | 3.17 | 8.93  | 186.33 | 80.67 | 4.45 | 13.76 | 38.33 | 35.00 |
| SHT 115      | 66.33 | 97.33 | 177.67 | 2.80 | 25.67 | 3.27 | 8.63  | 186.00 | 93.33 | 5.10 | 17.42 | 34.67 | 36.00 |
| SHT 116      | 60.00 | 89.33 | 173.33 | 2.67 | 26.00 | 3.07 | 8.67  | 187.33 | 89.33 | 4.90 | 17.23 | 40.33 | 37.67 |
| SHT 117      | 64.00 | 92.67 | 184.00 | 2.20 | 25.33 | 2.90 | 8.97  | 188.67 | 93.33 | 4.91 | 17.87 | 40.00 | 33.67 |
| SHT 118      | 44.67 | 80.33 | 163.33 | 2.93 | 20.00 | 3.10 | 10.77 | 161.33 | 16.67 | 3.60 | 15.62 | 34.00 | 33.33 |
| SHT 119      | 64.67 | 92.33 | 194.00 | 3.67 | 24.00 | 2.90 | 8.10  | 196.00 | 80.67 | 6.01 | 22.83 | 31.00 | 32.00 |
| SHT 120      | 58.00 | 89.00 | 195.33 | 2.47 | 25.33 | 3.00 | 9.83  | 189.67 | 69.67 | 5.23 | 20.28 | 36.00 | 32.67 |
| SHT 121      | 60.33 | 90.00 | 176.33 | 2.67 | 22.33 | 3.13 | 7.90  | 207.00 | 94.33 | 5.70 | 18.60 | 39.67 | 38.00 |
| E2: Jamnagar |       |       |        |      |       |      |       |        |       |      |       |       |       |
| Hybrid       | DF    | DM    | PH     | PTPP | PL    | PD   | TSW   | PP     | SS    | GY   | DFY   | Fe    | Zn    |
| SHT 101      | 47.33 | 78.00 | 210.67 | 2.67 | 27.67 | 3.37 | 9.90  | 221.33 | 61.00 | 6.15 | 11.40 | 48.33 | 39.33 |
| SHT 102      | 47.33 | 78.00 | 185.67 | 2.47 | 31.00 | 3.13 | 11.70 | 216.00 | 52.33 | 7.62 | 10.30 | 43.33 | 37.67 |
| SHT 103      | 48.00 | 77.67 | 191.67 | 2.93 | 25.67 | 2.80 | 10.00 | 221.00 | 66.00 | 7.18 | 13.10 | 46.33 | 36.00 |
| SHT 104      | 47.67 | 78.00 | 207.67 | 2.87 | 29.33 | 3.27 | 11.17 | 200.67 | 82.67 | 7.05 | 12.77 | 49.00 | 40.33 |

| SHT 105         | 49.33 | 78.67 | 232.00 | 2.33 | 28.00 | 3.73 | 10.43 | 197.67 | 76.33 | 7.61 | 12.30 | 53.33 | 41.33 |
|-----------------|-------|-------|--------|------|-------|------|-------|--------|-------|------|-------|-------|-------|
| SHT 106         | 49.33 | 79.33 | 194.00 | 2.93 | 28.00 | 3.10 | 11.27 | 214.67 | 59.00 | 8.45 | 14.23 | 56.00 | 38.67 |
| SHT 107         | 49.00 | 80.00 | 208.67 | 2.53 | 25.33 | 3.53 | 10.73 | 217.00 | 64.33 | 8.31 | 14.03 | 51.33 | 35.33 |
| SHT 108         | 48.33 | 78.33 | 201.00 | 2.67 | 31.33 | 3.33 | 9.10  | 222.33 | 80.67 | 7.71 | 11.43 | 50.00 | 38.67 |
| SHT 109         | 49.00 | 78.00 | 203.33 | 2.67 | 26.33 | 3.10 | 9.23  | 225.67 | 67.00 | 7.42 | 10.23 | 49.67 | 38.67 |
| SHT 110         | 49.00 | 80.00 | 206.00 | 2.67 | 31.67 | 3.33 | 10.03 | 213.67 | 78.00 | 8.17 | 11.23 | 48.00 | 38.33 |
| SHT 111         | 49.67 | 79.67 | 203.33 | 2.47 | 25.67 | 3.17 | 9.87  | 221.33 | 60.33 | 6.44 | 11.83 | 46.67 | 39.67 |
| SHT 112         | 46.67 | 76.67 | 176.67 | 3.47 | 28.67 | 2.93 | 9.37  | 230.67 | 64.00 | 6.50 | 10.97 | 59.33 | 41.67 |
| SHT 113         | 50.00 | 79.67 | 206.67 | 2.47 | 32.33 | 3.40 | 10.30 | 210.00 | 75.33 | 6.25 | 11.57 | 57.00 | 39.67 |
| SHT 114         | 53.00 | 82.67 | 199.33 | 2.47 | 29.00 | 3.73 | 9.97  | 228.67 | 84.33 | 7.54 | 13.57 | 66.33 | 39.00 |
| SHT 115         | 49.33 | 80.00 | 197.67 | 2.67 | 30.33 | 3.53 | 10.00 | 214.33 | 74.67 | 7.57 | 12.60 | 68.33 | 43.00 |
| SHT 116         | 49.67 | 80.33 | 192.00 | 2.47 | 28.67 | 3.13 | 9.37  | 215.00 | 79.67 | 6.20 | 9.40  | 52.67 | 42.00 |
| SHT 117         | 53.00 | 83.33 | 200.00 | 2.80 | 32.00 | 3.27 | 9.37  | 224.33 | 79.33 | 7.65 | 13.23 | 47.00 | 38.67 |
| SHT 118         | 44.67 | 75.00 | 186.33 | 3.13 | 28.00 | 3.50 | 11.40 | 221.67 | 42.67 | 6.53 | 11.17 | 49.33 | 40.00 |
| SHT 119         | 49.00 | 79.67 | 191.00 | 3.80 | 26.33 | 2.77 | 9.17  | 227.33 | 63.67 | 5.44 | 11.00 | 45.67 | 38.67 |
| SHT 120         | 48.67 | 79.00 | 195.67 | 2.67 | 30.33 | 3.07 | 10.27 | 215.67 | 75.00 | 6.63 | 10.23 | 47.67 | 38.67 |
| SHT 121         | 51.00 | 80.33 | 189.67 | 2.80 | 27.33 | 3.20 | 9.03  | 223.33 | 86.00 | 6.87 | 10.60 | 52.67 | 42.33 |
| E3: S. K. Nagar |       |       |        |      |       |      |       |        |       |      |       |       |       |
| Hybrid          | DF    | DM    | PH     | PTPP | PL    | PD   | TSW   | PP     | SS    | GY   | DFY   | Fe    | Zn    |
| SHT 101         | 56.33 | 82.67 | 214.67 | 1.53 | 27.00 | 3.23 | 10.10 | 224.33 | 47.33 | 6.23 | 9.67  | 70.00 | 21.67 |
| SHT 102         | 57.00 | 82.33 | 184.67 | 1.73 | 27.33 | 3.20 | 9.20  | 210.67 | 56.67 | 7.20 | 9.50  | 79.33 | 23.67 |
| SHT 103         | 56.67 | 81.00 | 213.00 | 1.87 | 26.67 | 3.23 | 10.03 | 230.00 | 36.00 | 7.10 | 10.33 | 47.00 | 20.33 |
| SHT 104         | 53.33 | 81.67 | 219.67 | 1.87 | 27.33 | 3.07 | 10.57 | 208.33 | 40.33 | 6.23 | 11.50 | 60.33 | 20.00 |
| SHT 105         | 61.67 | 88.00 | 208.00 | 1.73 | 26.33 | 3.43 | 9.37  | 225.00 | 57.00 | 7.63 | 10.17 | 71.33 | 20.33 |
| SHT 106         | 57.00 | 82.33 | 212.00 | 1.80 | 25.33 | 3.17 | 10.80 | 218.33 | 60.00 | 6.87 | 8.33  | 72.33 | 27.33 |
| SHT 107         | 57.00 | 83.00 | 240.00 | 1.73 | 26.00 | 3.43 | 10.47 | 208.00 | 52.00 | 7.40 | 11.00 | 71.33 | 21.33 |
| SHT 108         | 57.67 | 81.00 | 252.67 | 1.80 | 29.67 | 3.63 | 9.33  | 231.00 | 62.00 | 7.63 | 10.17 | 71.00 | 20.33 |
| SHT 109         | 58.33 | 80.33 | 221.00 | 1.80 | 25.33 | 3.20 | 10.37 | 224.00 | 66.33 | 6.40 | 9.17  | 74.00 | 19.67 |
| SHT 110         | 58.33 | 82.00 | 236.33 | 1.67 | 29.33 | 3.77 | 9.33  | 206.67 | 72.33 | 7.93 | 9.83  | 59.00 | 19.33 |
| SHT 111         | 56.33 | 82.00 | 252.33 | 1.67 | 27.67 | 3.40 | 11.10 | 207.67 | 49.00 | 6.37 | 10.67 | 68.33 | 25.33 |

|               |       |       |        |      |       |      |       |        |       |      |       |       |       |
|---------------|-------|-------|--------|------|-------|------|-------|--------|-------|------|-------|-------|-------|
| SHT 112       | 58.00 | 87.33 | 188.33 | 1.67 | 23.33 | 2.93 | 10.13 | 231.67 | 59.67 | 6.53 | 8.50  | 74.67 | 24.00 |
| SHT 113       | 59.67 | 87.67 | 236.00 | 1.67 | 26.33 | 3.23 | 10.60 | 219.33 | 60.33 | 5.57 | 9.17  | 92.67 | 23.67 |
| SHT 114       | 59.67 | 89.00 | 187.33 | 1.47 | 28.00 | 3.30 | 9.33  | 235.67 | 73.67 | 6.47 | 8.67  | 76.00 | 19.33 |
| SHT 115       | 55.33 | 82.67 | 201.33 | 1.80 | 25.00 | 3.53 | 10.97 | 194.33 | 67.33 | 6.70 | 9.67  | 75.67 | 24.00 |
| SHT 116       | 57.33 | 88.00 | 213.33 | 1.87 | 25.67 | 3.37 | 11.00 | 217.67 | 53.33 | 7.10 | 10.17 | 64.00 | 20.67 |
| SHT 117       | 59.67 | 86.33 | 213.33 | 1.80 | 27.67 | 2.87 | 9.57  | 234.33 | 66.33 | 5.83 | 10.33 | 62.00 | 27.67 |
| SHT 118       | 52.67 | 82.67 | 182.33 | 1.60 | 28.00 | 3.90 | 12.50 | 219.33 | 16.67 | 4.40 | 9.17  | 86.00 | 26.33 |
| SHT 119       | 54.00 | 82.00 | 217.33 | 1.53 | 26.33 | 3.07 | 9.80  | 228.00 | 43.33 | 6.50 | 7.33  | 56.00 | 21.33 |
| SHT 120       | 55.00 | 83.33 | 211.33 | 1.87 | 28.33 | 3.27 | 10.80 | 227.33 | 46.00 | 6.90 | 9.17  | 55.00 | 24.67 |
| SHT 121       | 57.67 | 86.67 | 210.00 | 1.60 | 28.00 | 3.57 | 10.53 | 232.33 | 66.67 | 7.60 | 9.17  | 58.67 | 20.00 |
|               |       |       |        |      |       |      |       |        |       |      |       |       |       |
| E4: Ahmedabad |       |       |        |      |       |      |       |        |       |      |       |       |       |
| Hybrid        | DF    | DM    | PH     | PTPP | PL    | PD   | TSW   | PP     | SS    | GY   | DFY   | Fe    | Zn    |
| SHT 101       | 53.00 | 81.67 | 201.67 | 1.00 | 25.33 | 3.00 | 6.20  | 211.33 | 81.67 | 6.74 | 17.49 | 35.67 | 11.33 |
| SHT 102       | 52.33 | 80.33 | 190.00 | 1.00 | 34.00 | 2.90 | 6.00  | 191.00 | 66.67 | 6.42 | 16.85 | 31.33 | 10.67 |
| SHT 103       | 51.00 | 78.00 | 191.67 | 1.00 | 22.67 | 2.73 | 4.50  | 218.33 | 55.67 | 6.42 | 20.52 | 35.00 | 5.67  |
| SHT 104       | 51.00 | 79.67 | 211.67 | 1.00 | 30.00 | 3.10 | 5.03  | 210.00 | 78.00 | 6.57 | 20.21 | 35.33 | 9.00  |
| SHT 105       | 53.67 | 81.67 | 200.67 | 1.33 | 27.67 | 3.10 | 5.37  | 201.67 | 52.00 | 6.42 | 16.52 | 51.67 | 11.00 |
| SHT 106       | 53.00 | 81.33 | 196.67 | 1.33 | 26.67 | 3.00 | 6.07  | 211.33 | 74.33 | 6.70 | 18.56 | 42.67 | 8.67  |
| SHT 107       | 52.67 | 80.67 | 215.67 | 1.00 | 25.33 | 3.40 | 5.57  | 203.33 | 78.00 | 6.63 | 19.55 | 41.67 | 6.67  |
| SHT 108       | 53.67 | 82.33 | 213.33 | 1.33 | 30.67 | 2.77 | 4.30  | 201.67 | 67.00 | 6.78 | 21.91 | 45.67 | 11.67 |
| SHT 109       | 54.33 | 83.00 | 211.67 | 1.33 | 26.67 | 3.23 | 4.83  | 205.00 | 78.00 | 6.67 | 20.56 | 43.67 | 15.67 |
| SHT 110       | 54.33 | 84.33 | 201.67 | 1.00 | 30.00 | 3.00 | 5.60  | 200.33 | 67.00 | 6.83 | 18.58 | 45.00 | 14.67 |
| SHT 111       | 54.67 | 83.00 | 206.67 | 1.67 | 25.33 | 3.20 | 4.77  | 188.00 | 78.00 | 6.18 | 17.48 | 37.00 | 10.00 |
| SHT 112       | 53.33 | 82.67 | 191.67 | 1.00 | 24.33 | 2.57 | 5.23  | 215.00 | 70.67 | 5.49 | 15.04 | 36.00 | 8.33  |
| SHT 113       | 54.33 | 82.67 | 206.67 | 1.33 | 27.67 | 3.27 | 5.77  | 193.33 | 74.33 | 5.95 | 20.45 | 40.67 | 8.33  |
| SHT 114       | 60.00 | 88.33 | 198.33 | 1.33 | 24.00 | 3.60 | 4.90  | 213.00 | 78.00 | 5.41 | 23.69 | 53.33 | 13.00 |
| SHT 115       | 51.67 | 81.00 | 210.67 | 1.00 | 25.67 | 3.10 | 5.50  | 216.67 | 78.00 | 6.40 | 21.52 | 42.33 | 12.33 |
| SHT 116       | 55.33 | 83.67 | 196.00 | 1.00 | 26.33 | 2.87 | 5.77  | 209.67 | 85.33 | 5.86 | 17.43 | 44.00 | 13.67 |
| SHT 117       | 55.00 | 83.33 | 206.67 | 1.33 | 29.67 | 3.10 | 4.97  | 207.00 | 78.00 | 5.80 | 21.09 | 40.33 | 10.67 |

| SHT 118        | 46.67 | 75.00  | 171.67 | 1.00 | 26.00 | 3.60 | 5.87  | 192.67 | 67.00  | 5.08 | 19.31 | 34.00 | 9.33  |
|----------------|-------|--------|--------|------|-------|------|-------|--------|--------|------|-------|-------|-------|
| SHT 119        | 52.33 | 81.00  | 195.00 | 1.33 | 21.67 | 2.70 | 4.73  | 215.33 | 78.00  | 5.32 | 19.01 | 39.33 | 10.67 |
| SHT 120        | 52.67 | 80.33  | 191.67 | 1.00 | 29.67 | 2.80 | 5.63  | 208.00 | 85.33  | 6.20 | 23.48 | 37.33 | 10.00 |
| SHT 121        | 53.33 | 82.00  | 188.33 | 1.00 | 24.67 | 3.37 | 5.17  | 193.67 | 78.00  | 6.50 | 17.53 | 34.00 | 13.33 |
| E5: NARP       |       |        |        |      |       |      |       |        |        |      |       |       |       |
| Hybrid         | DF    | DM     | PH     | PTPP | PL    | PD   | TSW   | PP     | SS     | GY   | DFY   | Fe    | Zn    |
| SHT 101        | 60.00 | 94.00  | 157.00 | 1.33 | 24.00 | 3.40 | 11.90 | 150.67 | 99.67  | 3.23 | 9.90  | 58.33 | 35.00 |
| SHT 102        | 61.00 | 96.00  | 136.00 | 2.00 | 31.33 | 3.20 | 11.23 | 153.67 | 98.67  | 3.90 | 8.50  | 65.67 | 44.00 |
| SHT 103        | 58.33 | 93.33  | 159.00 | 2.00 | 24.33 | 3.10 | 10.57 | 152.00 | 97.00  | 4.93 | 9.63  | 57.33 | 43.67 |
| SHT 104        | 59.00 | 94.33  | 163.33 | 1.67 | 24.67 | 3.27 | 12.23 | 150.00 | 99.00  | 2.98 | 10.13 | 61.67 | 38.33 |
| SHT 105        | 66.00 | 100.00 | 155.33 | 1.67 | 24.67 | 3.23 | 12.40 | 153.33 | 98.33  | 3.16 | 10.03 | 80.33 | 49.33 |
| SHT 106        | 65.00 | 97.67  | 161.67 | 2.67 | 27.00 | 3.20 | 13.07 | 154.33 | 99.67  | 4.25 | 9.90  | 83.67 | 45.67 |
| SHT 107        | 64.00 | 96.67  | 163.67 | 2.00 | 23.67 | 3.43 | 11.93 | 152.67 | 99.67  | 2.62 | 10.90 | 96.33 | 47.00 |
| SHT 108        | 60.33 | 97.00  | 167.00 | 2.67 | 28.33 | 3.47 | 10.03 | 155.00 | 99.33  | 3.88 | 10.33 | 89.00 | 52.33 |
| SHT 109        | 65.00 | 98.67  | 162.67 | 2.33 | 25.00 | 3.37 | 11.23 | 152.00 | 99.67  | 4.45 | 10.63 | 69.33 | 38.33 |
| SHT 110        | 64.00 | 96.33  | 140.67 | 1.67 | 27.00 | 3.20 | 10.90 | 152.00 | 98.33  | 2.73 | 9.67  | 73.00 | 44.00 |
| SHT 111        | 63.00 | 98.00  | 175.00 | 2.33 | 24.33 | 3.37 | 11.10 | 153.33 | 99.00  | 4.09 | 9.63  | 63.00 | 41.33 |
| SHT 112        | 61.33 | 94.67  | 159.67 | 2.67 | 26.33 | 3.13 | 11.90 | 150.67 | 96.00  | 5.02 | 10.03 | 73.33 | 41.67 |
| SHT 113        | 61.33 | 96.33  | 155.33 | 2.00 | 28.67 | 3.37 | 13.27 | 150.67 | 97.67  | 3.65 | 9.47  | 82.33 | 44.67 |
| SHT 114        | 68.00 | 101.00 | 160.00 | 2.00 | 24.67 | 3.63 | 11.40 | 154.00 | 99.67  | 3.96 | 10.53 | 89.33 | 46.33 |
| SHT 115        | 65.00 | 99.33  | 165.33 | 2.33 | 26.33 | 3.70 | 12.13 | 154.67 | 99.00  | 2.03 | 7.60  | 88.00 | 48.00 |
| SHT 116        | 63.00 | 99.00  | 148.67 | 2.00 | 24.67 | 3.27 | 13.33 | 150.67 | 100.00 | 4.22 | 10.50 | 55.67 | 36.33 |
| SHT 117        | 63.00 | 100.00 | 154.00 | 1.00 | 28.00 | 3.20 | 12.93 | 151.33 | 98.67  | 4.35 | 9.77  | 70.67 | 37.33 |
| SHT 118        | 62.00 | 96.33  | 122.00 | 2.33 | 26.00 | 3.20 | 12.27 | 150.67 | 97.00  | 3.88 | 9.30  | 84.00 | 42.33 |
| SHT 119        | 62.67 | 98.00  | 160.67 | 1.67 | 25.00 | 3.13 | 10.53 | 153.00 | 98.00  | 5.12 | 10.13 | 73.67 | 43.67 |
| SHT 120        | 62.00 | 99.00  | 163.67 | 1.67 | 27.67 | 3.37 | 12.70 | 152.67 | 99.67  | 4.72 | 9.17  | 67.67 | 37.00 |
| SHT 121        | 60.67 | 97.00  | 154.33 | 2.67 | 25.33 | 3.17 | 11.47 | 152.00 | 99.33  | 4.99 | 8.00  | 75.00 | 37.67 |
| E6: Coimbatore |       |        |        |      |       |      |       |        |        |      |       |       |       |
| Hybrid         | DF    | DM     | PH     | PTPP | PL    | PD   | TSW   | PP     | SS     | GY   | DFY   | Fe    | Zn    |
| SHT 101        | 53.00 | 94.00  | 201.33 | 2.53 | 25.67 | 3.47 | 12.97 | 102.00 | 77.00  | 4.30 | 8.88  | 48.33 | 44.67 |

|         |       |       |        |      |       |      |       |        |       |      |       |       |       |
|---------|-------|-------|--------|------|-------|------|-------|--------|-------|------|-------|-------|-------|
| SHT 102 | 49.67 | 91.33 | 175.67 | 2.67 | 30.33 | 3.43 | 13.10 | 115.33 | 84.33 | 4.51 | 8.70  | 59.00 | 46.00 |
| SHT 103 | 51.33 | 92.00 | 205.67 | 2.40 | 23.00 | 3.03 | 11.13 | 107.00 | 65.67 | 4.79 | 10.28 | 40.00 | 37.67 |
| SHT 104 | 49.00 | 90.33 | 215.67 | 2.67 | 28.67 | 3.37 | 12.20 | 110.67 | 87.33 | 5.33 | 11.32 | 50.33 | 39.00 |
| SHT 105 | 50.67 | 93.00 | 200.00 | 2.47 | 26.00 | 3.77 | 12.93 | 117.00 | 49.33 | 5.99 | 10.97 | 56.33 | 45.33 |
| SHT 106 | 48.67 | 90.67 | 206.33 | 2.67 | 24.67 | 3.43 | 13.03 | 121.00 | 86.67 | 5.79 | 10.09 | 55.00 | 38.67 |
| SHT 107 | 50.33 | 92.00 | 210.33 | 2.27 | 25.67 | 3.77 | 10.60 | 112.67 | 85.00 | 4.57 | 8.90  | 56.00 | 42.33 |
| SHT 108 | 50.67 | 93.00 | 213.33 | 2.67 | 29.33 | 3.60 | 9.77  | 105.67 | 83.67 | 4.43 | 9.89  | 49.00 | 41.67 |
| SHT 109 | 53.33 | 95.67 | 211.33 | 2.53 | 27.00 | 3.63 | 9.73  | 108.67 | 90.33 | 5.96 | 10.37 | 44.33 | 39.67 |
| SHT 110 | 51.33 | 92.67 | 215.67 | 2.67 | 32.67 | 4.00 | 11.03 | 113.33 | 79.67 | 5.22 | 11.35 | 48.33 | 38.67 |
| SHT 111 | 54.00 | 95.00 | 214.67 | 2.53 | 26.33 | 3.40 | 11.13 | 104.67 | 75.00 | 5.53 | 11.11 | 38.00 | 33.67 |
| SHT 112 | 51.67 | 92.67 | 201.00 | 2.40 | 27.00 | 3.13 | 10.10 | 108.00 | 83.33 | 4.14 | 9.84  | 52.00 | 43.33 |
| SHT 113 | 49.00 | 91.00 | 210.00 | 2.47 | 30.67 | 3.73 | 12.83 | 109.67 | 89.33 | 3.64 | 9.08  | 61.00 | 51.33 |
| SHT 114 | 58.00 | 97.00 | 200.33 | 2.40 | 27.33 | 4.10 | 11.10 | 101.33 | 92.33 | 4.18 | 9.98  | 72.67 | 47.67 |
| SHT 115 | 47.67 | 89.00 | 210.33 | 2.53 | 28.33 | 3.63 | 12.97 | 106.67 | 88.67 | 6.77 | 11.58 | 65.33 | 53.00 |
| SHT 116 | 53.33 | 92.67 | 179.67 | 2.40 | 30.33 | 3.40 | 10.10 | 106.00 | 71.00 | 4.23 | 8.09  | 49.00 | 42.33 |
| SHT 117 | 53.67 | 94.00 | 203.00 | 2.40 | 30.33 | 3.50 | 11.17 | 96.00  | 89.00 | 3.48 | 7.62  | 54.00 | 39.00 |
| SHT 118 | 42.67 | 84.67 | 213.67 | 2.60 | 28.33 | 3.80 | 12.20 | 106.67 | 29.33 | 4.05 | 7.93  | 50.00 | 41.67 |
| SHT 119 | 55.67 | 96.67 | 223.00 | 2.87 | 25.33 | 3.20 | 10.07 | 118.00 | 82.33 | 3.39 | 8.48  | 44.33 | 38.00 |
| SHT 120 | 48.67 | 90.33 | 207.00 | 2.40 | 32.00 | 3.73 | 12.20 | 110.67 | 83.67 | 3.89 | 7.59  | 45.00 | 45.33 |
| SHT 121 | 54.00 | 96.67 | 209.67 | 2.53 | 25.00 | 3.50 | 11.10 | 111.33 | 89.33 | 4.14 | 7.95  | 48.33 | 42.00 |

DF: days to 50% flowering, DM: days to maturity, PH: plant height, PTPP: number of productive tillers per plant, PL: panicle length, PD, panicle diameter, TSW: 1000 seed weight, PP: plant population at harvest, SS%: seed set under bagging condition, GY: grain yield, DFY: dry fodder yield, Fe: grain iron content, Zn: grain zinc content.



Table S5: PC value, mean over environment and WAAS score for dry fodder yield, Fe content and Zn content of 21 hybrids evaluated over six different locations

| Hybrid                     | Mean over environment | PC1    | PC2    | PC3    | PC4    | PC5    | WAAS  |
|----------------------------|-----------------------|--------|--------|--------|--------|--------|-------|
| <b>1. Dry fodder yield</b> |                       |        |        |        |        |        |       |
| SHT 101                    | 13.318                | −1.040 | 0.046  | 0.308  | 0.312  | 0.124  | 0.608 |
| SHT 102                    | 11.848                | 0.025  | −0.581 | 0.173  | −0.383 | 0.284  | 0.228 |
| SHT 103                    | 14.483                | −0.574 | 0.475  | −0.353 | 0.374  | 0.419  | 0.506 |
| SHT 104                    | 14.709                | −0.470 | 0.070  | −0.263 | −0.214 | 0.457  | 0.324 |
| SHT 105                    | 13.565                | −0.871 | −0.751 | −0.222 | 0.086  | 0.024  | 0.684 |
| SHT 106                    | 13.405                | 0.055  | −0.430 | −0.544 | 1.079  | −0.328 | 0.286 |
| SHT 107                    | 13.922                | 0.289  | −0.353 | 0.539  | 0.703  | 0.406  | 0.364 |
| SHT 108                    | 13.888                | 0.352  | 0.541  | 0.099  | −0.437 | −0.123 | 0.376 |
| SHT 109                    | 14.144                | −0.968 | 0.913  | −0.044 | −0.416 | −0.623 | 0.816 |
| SHT 110                    | 13.691                | −0.652 | −0.114 | −0.467 | −0.450 | −0.153 | 0.45  |
| SHT 111                    | 13.469                | −0.445 | −0.676 | −0.251 | −0.364 | 0.216  | 0.474 |
| SHT 112                    | 11.747                | 0.049  | −1.403 | 0.103  | −0.134 | −0.700 | 0.461 |
| SHT 113                    | 13.095                | 0.297  | 0.313  | −0.020 | −0.009 | −0.062 | 0.245 |
| SHT 114                    | 13.366                | 2.130  | 0.104  | −0.306 | 0.125  | −0.706 | 1.206 |
| SHT 115                    | 13.397                | 0.828  | 0.061  | −1.307 | −0.446 | 0.446  | 0.615 |
| SHT 116                    | 12.136                | 0.094  | −0.473 | 1.089  | −0.712 | −0.175 | 0.332 |
| SHT 117                    | 13.319                | 0.769  | 0.230  | 0.533  | 0.605  | 0.598  | 0.582 |
| SHT 118                    | 12.082                | 0.861  | −0.206 | 0.416  | −0.072 | 0.023  | 0.546 |
| SHT 119                    | 13.131                | −0.913 | 0.744  | 0.063  | 0.627  | −0.767 | 0.765 |
| SHT 120                    | 13.321                | 0.354  | 1.595  | 0.333  | −0.270 | 0.128  | 0.673 |
| SHT 121                    | 11.975                | −0.171 | −0.105 | 0.121  | −0.004 | 0.513  | 0.154 |
| E1                         | 19.460                | −2.781 | 1.141  | −0.086 | 0.301  | 0.118  | 1.790 |
| E2                         | 11.771                | 0.792  | −0.848 | −0.474 | 1.629  | 0.394  | 0.819 |
| E3                         | 9.603                 | 0.137  | −0.778 | 0.847  | −0.828 | 1.294  | 0.480 |
| E4                         | 19.371                | 1.842  | 2.117  | −0.180 | −0.253 | −0.033 | 1.569 |
| E5                         | 9.703                 | 0.132  | −0.582 | 1.333  | 0.083  | −1.247 | 0.411 |
| E6                         | 9.523                 | −0.122 | −1.049 | −1.440 | −0.932 | −0.525 | 0.567 |
| <b>2. Fe content</b>       |                       |        |        |        |        |        |       |
| SHT 101                    | 50.056                | −0.982 | 2.185  | 0.153  | −0.225 | −0.757 | 1.249 |
| SHT 102                    | 50.222                | 2.237  | 2.090  | −1.675 | 1.340  | −0.858 | 2.095 |
| SHT 103                    | 43.500                | −2.620 | −0.358 | −0.215 | −0.569 | −0.058 | 1.463 |
| SHT 104                    | 48.111                | −0.886 | 0.577  | −1.196 | −0.058 | −0.170 | 0.833 |

| SHT 105              | 58.278                | −0.029 | −0.667 | −0.032 | 1.771  | 0.764  | 0.244 |
|----------------------|-----------------------|--------|--------|--------|--------|--------|-------|
| SHT 106              | 58.444                | 0.352  | −0.664 | 0.397  | −0.549 | −0.330 | 0.464 |
| Hybrid               | Mean over environment | PC1    | PC2    | PC3    | PC4    | PC5    | WAAS  |
| SHT 107              | 58.500                | 1.901  | −2.439 | 0.590  | 0.068  | −0.694 | 1.865 |
| SHT 108              | 56.722                | 0.955  | −1.703 | 1.501  | 0.716  | 0.454  | 1.296 |
| SHT 109              | 53.111                | −0.280 | 1.052  | 1.473  | 0.666  | 1.076  | 0.736 |
| SHT 110              | 51.722                | −1.172 | −1.052 | 0.294  | 0.971  | −0.049 | 0.987 |
| SHT 111              | 48.444                | −0.817 | 1.286  | 1.810  | −0.266 | 0.660  | 1.139 |
| SHT 112              | 55.389                | 0.396  | 0.883  | −0.245 | −1.706 | 0.818  | 0.534 |
| SHT 113              | 62.000                | 2.327  | 1.749  | 0.272  | −0.151 | −0.144 | 1.794 |
| SHT 114              | 66.000                | 0.636  | −1.080 | −2.374 | 0.695  | 0.589  | 1.072 |
| SHT 115              | 62.389                | 1.280  | −0.842 | −2.027 | −1.522 | 1.261  | 1.256 |
| SHT 116              | 50.944                | −2.304 | 1.703  | −0.478 | 0.513  | 0.604  | 1.800 |
| SHT 117              | 52.333                | −0.952 | −0.236 | −0.288 | 0.509  | −1.824 | 0.602 |
| SHT 118              | 56.222                | 2.679  | 0.763  | 1.610  | −0.587 | −0.278 | 1.858 |
| SHT 119              | 48.333                | −0.552 | −1.509 | 0.294  | 0.475  | 0.264  | 0.831 |
| SHT 120              | 48.111                | −1.392 | −0.726 | 0.061  | −0.302 | −0.359 | 0.948 |
| SHT 121              | 51.389                | −0.777 | −1.012 | 0.075  | −1.791 | −0.969 | 0.740 |
| E1                   | 36.143                | −3.621 | 0.821  | 2.080  | −1.158 | −1.798 | 2.426 |
| E2                   | 51.810                | −1.230 | 0.125  | −1.616 | −2.522 | 1.999  | 0.923 |
| E3                   | 68.794                | 3.636  | 3.968  | 1.454  | 0.340  | 0.364  | 3.387 |
| E4                   | 40.286                | −2.538 | −0.796 | 0.527  | 2.999  | 1.340  | 1.620 |
| E5                   | 74.159                | 3.082  | −4.377 | 1.342  | −0.478 | −0.289 | 3.230 |
| E6                   | 51.730                | 0.671  | 0.258  | −3.787 | 0.819  | −1.617 | 1.047 |
| <b>3. Zn content</b> |                       |        |        |        |        |        |       |
| SHT 101              | 31.222                | −1.377 | 1.076  | −0.016 | 0.295  | −0.496 | 0.992 |
| SHT 102              | 31.500                | 0.687  | 0.678  | 0.842  | −1.869 | 0.189  | 0.716 |
| SHT 103              | 29.111                | 0.819  | −0.703 | 0.307  | 0.270  | 0.230  | 0.673 |
| SHT 104              | 30.000                | −0.689 | −0.153 | −0.300 | 0.351  | 0.925  | 0.428 |
| SHT 105              | 34.722                | 1.090  | 0.114  | −0.941 | 1.467  | −0.015 | 0.732 |
| SHT 106              | 32.833                | 0.246  | −1.421 | 0.887  | 1.011  | −0.706 | 0.773 |
| SHT 107              | 30.833                | 1.485  | −0.096 | 0.476  | 0.119  | −0.454 | 0.809 |
| SHT 108              | 33.278                | 1.859  | −0.769 | −0.882 | −0.047 | −0.106 | 1.289 |
| SHT 109              | 30.444                | −0.914 | −0.085 | −1.122 | −1.345 | −0.382 | 0.679 |
| SHT 110              | 31.056                | 0.195  | −0.685 | −1.260 | −1.106 | −0.241 | 0.581 |
| SHT 111              | 30.556                | −0.619 | −1.940 | 0.361  | 0.011  | 0.319  | 1.008 |
| SHT 112              | 32.056                | −0.169 | 0.178  | 0.718  | 0.123  | 1.182  | 0.286 |
| SHT 113              | 34.222                | 0.654  | 1.598  | 0.786  | 0.884  | −0.325 | 0.998 |

| SHT 114 | 33.389                | 0.881  | 0.989  | −0.861 | −0.233 | −0.442 | 0.913 |
|---------|-----------------------|--------|--------|--------|--------|--------|-------|
| SHT 115 | 36.056                | 0.886  | 1.556  | 0.249  | −0.218 | 0.567  | 0.978 |
| Hybrid  | Mean over environment | PC1    | PC2    | PC3    | PC4    | PC5    | WAAS  |
| SHT 116 | 32.111                | −1.567 | 0.440  | −0.923 | 0.580  | 0.009  | 1.055 |
| SHT 117 | 31.167                | −1.303 | −0.715 | 1.120  | −0.182 | −0.664 | 1.068 |
| SHT 118 | 32.167                | −0.189 | −0.413 | 1.016  | −0.134 | 0.265  | 0.436 |
| SHT 119 | 30.722                | 0.238  | −0.876 | −0.323 | −0.384 | 0.275  | 0.47  |
| SHT 120 | 31.389                | −0.911 | 0.906  | 0.956  | −0.318 | −0.370 | 0.919 |
| SHT 121 | 32.222                | −1.303 | 0.320  | −1.091 | 0.727  | 0.240  | 0.929 |
| E1      | 34.190                | −0.719 | −0.290 | −0.746 | 2.827  | −0.710 | 0.581 |
| E2      | 39.413                | −1.291 | −0.205 | −0.435 | 0.140  | 1.918  | 0.748 |
| E3      | 22.429                | −1.082 | −1.404 | 2.897  | −0.548 | −0.402 | 1.568 |
| E4      | 10.698                | −1.425 | −0.425 | −2.033 | −1.901 | −0.793 | 1.216 |
| E5      | 42.571                | 3.821  | −1.347 | −0.346 | −0.233 | 0.132  | 2.267 |
| E6      | 42.429                | 0.695  | 3.670  | 0.662  | −0.285 | −0.146 | 1.686 |

PC: principal component, WAAS: weighted average of absolute score, E1: Mandor, E2: Jamnagar, E3: S. K. Nagar, E4: Ahmedabad, E5: NARP, Aurangabad, E6: Coimbatore.

Table S6: Pearson's correlation coefficient among all traits over environments

|            | <b>DF</b> | <b>DM</b> | <b>PH</b> | <b>NPT</b> | <b>PL</b> | <b>PD</b> | <b>TSW</b> | <b>PP</b> | <b>SS</b> | <b>GY</b> | <b>DFY</b> | <b>Fe</b> | <b>Zn</b> |
|------------|-----------|-----------|-----------|------------|-----------|-----------|------------|-----------|-----------|-----------|------------|-----------|-----------|
| <b>DF</b>  | 1.00      |           |           |            |           |           |            |           |           |           |            |           |           |
| <b>DM</b>  | 0.68      | 1.00      |           |            |           |           |            |           |           |           |            |           |           |
| <b>PH</b>  | -0.44     | -0.48     | 1.00      |            |           |           |            |           |           |           |            |           |           |
| <b>NPT</b> | -0.07     | 0.14      | -0.09     | 1.00       |           |           |            |           |           |           |            |           |           |
| <b>PL</b>  | -0.29     | -0.20     | 0.19      | 0.02       | 1.00      |           |            |           |           |           |            |           |           |
| <b>PD</b>  | -0.07     | 0.21      | 0.16      | 0.08       | 0.23      | 1.00      |            |           |           |           |            |           |           |
| <b>TSW</b> | 0.11      | 0.46      | -0.21     | 0.38       | 0.05      | 0.40      | 1.00       |           |           |           |            |           |           |
| <b>PP</b>  | -0.03     | -0.66     | 0.19      | -0.14      | 0.00      | -0.37     | -0.45      | 1.00      |           |           |            |           |           |
| <b>SS</b>  | 0.38      | 0.54      | -0.39     | 0.06       | -0.02     | 0.06      | 0.10       | -0.36     | 1.00      |           |            |           |           |
| <b>GY</b>  | -0.36     | -0.68     | 0.53      | -0.07      | 0.22      | -0.09     | -0.32      | 0.60      | -0.35     | 1.00      |            |           |           |
| <b>DFY</b> | 0.06      | -0.23     | 0.02      | -0.08      | -0.15     | -0.38     | -0.68      | 0.32      | -0.03     | 0.20      | 1.00       |           |           |
| <b>Fe</b>  | 0.30      | 0.30      | -0.15     | -0.08      | 0.02      | 0.33      | 0.50       | -0.10     | 0.14      | -0.18     | -0.62      | 1.00      |           |
| <b>Zn</b>  | 0.06      | 0.49      | -0.33     | 0.59       | 0.08      | 0.33      | 0.74       | -0.50     | 0.34      | -0.40     | -0.46      | 0.32      | 1.00      |

DF: days to 50% flowering, DM: days to maturity, PH: plant height, NPT: number of productive tillers per plant, PL: panicle length, PD: panicle diameter, TSW: 1000 seed weight, PP: plant population at harvest, SS: seed set under bagging condition, GY: grain yield, DFY: dry fodder yield, Fe: grain iron content and Zn: grain zinc content

Table S7: Genotype-ideotype (ID) scores, MTSI values for the 21 pearl millet hybrids for the first four factors along with relative contribution of each factor towards the MTSI

| Sr. No. | Hybrid  | FA1    | RC %  | FA2    | RC %  | FA3    | RC %  | FA4    | RC %  | MTSI         |
|---------|---------|--------|-------|--------|-------|--------|-------|--------|-------|--------------|
| 1       | SHT 101 | -4.000 | 34.92 | -3.715 | 32.43 | -2.770 | 24.18 | -0.971 | 8.48  | 6.208        |
| 2       | SHT 102 | -3.917 | 47.28 | -2.882 | 34.79 | -1.468 | 17.72 | -0.017 | 0.21  | 7.393        |
| 3       | SHT 103 | -5.045 | 50.24 | -2.841 | 28.29 | -1.796 | 17.88 | 0.360  | 3.58  | 6.795        |
| 4       | SHT 104 | -5.746 | 39.06 | -4.655 | 31.64 | -4.213 | 28.64 | -0.097 | 0.66  | <b>3.853</b> |
| 5       | SHT 105 | -3.162 | 26.5  | -4.925 | 41.27 | -3.142 | 26.33 | 0.705  | 5.91  | 5.533        |
| 6       | SHT 106 | -4.264 | 30.27 | -5.095 | 36.17 | -4.464 | 31.69 | -0.263 | 1.87  | <b>4.153</b> |
| 7       | SHT 107 | -4.575 | 33.23 | -3.948 | 28.68 | -3.504 | 25.45 | -1.740 | 12.64 | 5.697        |
| 8       | SHT 108 | -4.851 | 37.74 | -5.797 | 45.10 | -1.670 | 12.99 | 0.537  | 4.18  | 5.37         |
| 9       | SHT 109 | -3.295 | 29.25 | -5.315 | 47.19 | -1.801 | 15.99 | -0.853 | 7.57  | 6.384        |
| 10      | SHT 110 | -4.420 | 34.42 | -5.072 | 39.5  | -2.835 | 22.08 | 0.514  | 4.00  | <b>4.931</b> |
| 11      | SHT 111 | -3.823 | 33.11 | -3.886 | 33.66 | -2.289 | 19.83 | -1.548 | 13.41 | 6.656        |
| 12      | SHT 112 | -3.598 | 25.45 | -4.788 | 33.86 | -2.930 | 20.72 | 2.823  | 19.97 | 5.825        |
| 13      | SHT 113 | -3.920 | 28.58 | -4.811 | 35.08 | -3.978 | 29.00 | -1.007 | 7.34  | 4.977        |
| 14      | SHT 114 | -1.484 | 15.63 | -4.873 | 51.33 | -3.049 | 32.12 | 0.087  | 0.92  | 6.865        |
| 15      | SHT 115 | -1.982 | 16.92 | -4.681 | 39.97 | -3.956 | 33.78 | -1.092 | 9.32  | 6.401        |
| 16      | SHT 116 | -3.312 | 37.98 | -3.736 | 42.84 | -1.270 | 14.56 | -0.403 | 4.62  | 7.351        |
| 17      | SHT 117 | -3.750 | 30.79 | -5.485 | 45.03 | -2.645 | 21.71 | 0.301  | 2.47  | 5.258        |
| 18      | SHT 118 | -3.343 | 31.59 | -1.603 | 15.15 | -4.568 | 43.16 | 1.069  | 10.10 | 7.129        |
| 19      | SHT 119 | -2.585 | 26.33 | -3.923 | 39.95 | -3.116 | 31.73 | 0.195  | 1.99  | 6.478        |
| 20      | SHT 120 | -4.693 | 35.34 | -4.643 | 34.97 | -3.817 | 28.75 | -0.125 | 0.94  | 4.496        |
| 21      | SHT 121 | -3.332 | 32.12 | -4.292 | 41.37 | -2.307 | 22.24 | -0.443 | 4.27  | 6.374        |

FA: factor analysis, RC: relative contribution and MTSI: multi trait stability index
